# Supplementary material for: Factors Influencing the Utilization of Large Language Models among Medical Students in Bangladesh: A KAP Study
Source: Research Square preprint supplement (doi:10.21203/rs.3.rs-6740202/v1), 2025-06-25
Supplement: Supplementary file 1 [file 3ddc34817bfd0bee32636fac.pdf]

# Effectiveness of Large Language Models in Medical Education: Insights from Undergraduate Medical Students in Bangladesh

**Introduction:** You are being invited to participate in a research study about the use of large language models in medical education. This study aims to understand the perspectives and experiences of undergraduate medical students in Bangladesh regarding this technology. Participation in this study is voluntary, and you can withdraw at any time without penalty.

**Purpose of the Study:** This study seeks to evaluate the effectiveness and applicability of large language models as educational tools in the context of medical education in Bangladesh.

**What You Will Do:** If you agree to participate, you will be asked to complete an online survey through Google Forms. The survey will take approximately [Specify Duration] to complete and will consist of questions about your experiences and opinions regarding the use of large language models in your education.

**Confidentiality:** Your responses will be kept confidential. Data will be stored securely and will only be accessed by the research team. Results will be reported in aggregate form, and no individual responses will be identifiable in any publications or presentations resulting from this study.

**Risks and Benefits:** There are no significant risks associated with participation in this study. While there is no direct benefit to you, your responses will contribute valuable insights to the understanding of large language models in medical education.

**Right to Withdraw:** Your participation in this study is entirely voluntary, and you can withdraw at any time without consequence.

## Concerns

If you've any queries regarding the data that you provided, you can email [chiralbd@gmail.com](mailto:chiralbd@gmail.com). You can also email [contact.jubayerhossain@gmail.com](mailto:contact.jubayerhossain@gmail.com) (Md. Jubayer Hossain) if you'd like to consult with someone about your rights.

## About CHIRAL Bangladesh

1. About Us - <https://chiralbd.org/about/>
2. Website: <https://chiralbd.org/>

\* Indicates required question

1. **Consent:**

\*

By proceeding with the survey, you acknowledge that you have read and understood this consent form, and agree to participate in this research study.

*Mark only one oval.*

☐ I agree      *Skip to question 2*

☐ I disagree

## Demographic Information

Gathering demographic information is essential for contextualizing research findings and understanding the characteristics of the study population. In this section, we outline the key demographic variables to be collected from undergraduate medical students in Bangladesh participating in our study on Large Language Models (LLMs) in medical education.

2. Age \*

---

3. Gender \*

*Mark only one oval.*

☐ Male

☐ Female

4. Type of medical college \*

*Mark only one oval.*

☐ Public

☐ Private

## 5. Year of Study \*

*Mark only one oval.*

☐ 1st year

☐ 2nd year

☐ 3rd year

☐ 4th year

☐ 5th year

**Understanding Large Language Models (LLMs)**

In this section, we aim to assess the baseline knowledge of undergraduate medical students in Bangladesh regarding Large Language Models (LLMs). Large Language Models, such as GPT-3, are advanced artificial intelligence models trained on vast amounts of text data to generate human-like text. Understanding the level of familiarity and comprehension of LLMs among students is crucial for evaluating their readiness to engage with LLM-based educational materials in medical education.

## 6. Questions on knowledge of LLMs \*

Mark only one oval per row.

|                                                                                  | Strongly agree        | Agree                 | Neutral               | Disagree              | Strongly disagree     |
|----------------------------------------------------------------------------------|-----------------------|-----------------------|-----------------------|-----------------------|-----------------------|
| I am familiar with LLMs like ChatGPT, Google Bard, Microsoft Bing, or Perplexity | <input type="radio"/> |
| I understand how LLMs generate information and responses                         | <input type="radio"/> |
| LLMs can generate wrong information                                              | <input type="radio"/> |
| LLM can be used both by teachers and students                                    | <input type="radio"/> |
| Using LLMs helps me simplify complicated medical concepts                        | <input type="radio"/> |
| LLMs can help along                                                              | <input type="radio"/> |

will  
with  
traditional  
traditional  
learning  
learning  
materials  
materials  
like  
like  
textbooks,  
textbooks,  
notes, e-  
notes, e-  
books, etc.  
books, etc.

---

## Assessing Attitudes Towards Large Language Models (LLMs)

This section aims to delve into the attitudes of undergraduate medical students in Bangladesh towards Large Language Models (LLMs). Understanding students' attitudes towards LLMs is essential for evaluating their receptivity to integrating these advanced AI models into medical education. Positive attitudes can foster engagement and utilization, while negative attitudes may hinder adoption and effectiveness.

## 7. Questions on attitude of LLMs \*

Mark only one oval per row.

|                                                                                         | Strongly Agree        | Agree                 | Neutral               | Disagree              | Strongly Disagree     |
|-----------------------------------------------------------------------------------------|-----------------------|-----------------------|-----------------------|-----------------------|-----------------------|
| <b>I am open to including LLMs as extra learning tools for medical studies</b>          | <input type="radio"/> |
| <b>It would help by providing comprehensive medical information</b>                     | <input type="radio"/> |
| <b>Medical colleges should promote the use of LLMs in the teaching-learning process</b> | <input type="radio"/> |
| <b>LLMs could change how we learn and access medical knowledge</b>                      | <input type="radio"/> |
| <b>Relying too much on LLMs might not develop my clinical reasoning skills</b>          | <input type="radio"/> |

There is a risk

of learning the

or learning the  
There is a risk  
wrong  
of learning the  
concept,  
wrong, I would  
not blindly  
believe it  
hence, I would  
not blindly  
believe it

☐☐☐☐☐

Exploring Practices Towards Large Language Models (LLMs) in Medical Education

This section focuses on investigating the practices of undergraduate medical students in Bangladesh regarding the utilization of Large Language Models (LLMs) in their educational journey. Understanding students' current practices towards LLMs is essential for identifying areas of integration, challenges, and opportunities for enhancing their usage in medical education.

## 8. Questions on Practices of LLMs \*

Mark only one oval per row.

|                                                                                     | Strongly Agree        | Agree                 | Neutral               | Disagree              | Strongly Disagree     |
|-------------------------------------------------------------------------------------|-----------------------|-----------------------|-----------------------|-----------------------|-----------------------|
| I use LLMs to get clearer explanations of medical topics I'm learning               | <input type="radio"/> |
| LLMs have shown me new resources and references for my medical studies              | <input type="radio"/> |
| I use those only when I cannot get the information in a book                        | <input type="radio"/> |
| I use those only when I cannot get the information in Google or other search engine | <input type="radio"/> |
| I adapt my self-study based on insights I                                           | <input type="radio"/> |



get from  
get from  
LLMs  
LLMs

---

Using LLMs  
Using LLMs  
has made  
has made  
me more  
me more  
confident in  
confident in  
talking  
talking  
about  
about  
medical  
medical  
subjects  
subjects

---

Copyright

© 2024,Center for Health Innovation, Research, Action and Learning - Bangladesh (CHIRAL Bangladesh). All Rights Reserved.

**NOTE:** It is prohibited to manipulate and regenerate this questionnaire data without permission. If you have any query, please don't hesitate to contact [chiralbd@gmail.com](mailto:chiralbd@gmail.com) or [contact.jubayerhossain@gmail.com](mailto:contact.jubayerhossain@gmail.com)

This content is neither created nor endorsed by Google.

Google Forms
